# Supplementary material
Source: PubMed Central journal article supplement (PMC9198729)

## Supplemental Online Content

Cox LS, Nollen NL, Mayo MS, et al. Effect of Varenicline Added to Counseling on Smoking Cessation Among African American Daily Smokers. *JAMA*. Published online June 14, 2022. doi:10.1001/jama.2022.8274

**Supplement 2. eTable 1.** Verified 7-day point prevalence smoking abstinence over time by treatment and smoking level (cigarettes/day)

**eTable 2.** Week 26 self-reported and verified 7-day point prevalence smoking abstinence

**eFigure 1.** Self-reported medication adherence over time by treatment

This supplemental material has been provided by the authors to give readers additional information about their work.

eTable 1. Verified 7-day point prevalence smoking abstinence over time by treatment and smoking level (cigarettes/day)

| Week | Smoking Level<br>cigarettes/day | n   | Smoking Abstinence (%) |                    | Difference<br>(95% CI) | Odds Ratio<br>(95% CI) | P value | Interaction<br>P value |
|------|---------------------------------|-----|------------------------|--------------------|------------------------|------------------------|---------|------------------------|
|      |                                 |     | Varenicline<br>n = 300 | Placebo<br>n = 200 |                        |                        |         |                        |
| 4    | Overall                         | 500 | 48/300 (16.0%)         | 10/200 (5.0%)      | 11.0% (5.9%-16.1%)     | 3.6 (1.8-7.3)          | <.001   | 0.36                   |
|      | Light 1-10                      | 260 | 34/154 (22.0%)         | 6/106 (5.7%)       | 16.3% (8.4%-14.2%)     | 4.7 (1.9-11.7)         | <.001   |                        |
|      | Heavy >10                       | 240 | 14/146 (9.6%)          | 4/94 (4.3%)        | 5.3% (-1.0%-11.6%)     | 2.4 (.8-7.5)           | 0.13    |                        |
| 12   | Overall                         | 500 | 56/300 (18.7%)         | 14/200 (7.0%)      | 11.7% (6.0%-17.7%)     | 3.0 (1.7-5.6)          | <.001   | 0.96                   |
|      | Light 1-10                      | 260 | 34/154 (22.1%)         | 9/106 (8.5%)       | 13.6% (5.2%-22.0%)     | 3.0 (1.4-6.7)          | 0.004   |                        |
|      | Heavy >10                       | 240 | 22/146 (15.1%)         | 5/94 (5.3%)        | 9.8% (2.4%-17.2%)      | 3.1 (1.1-8.6)          | 0.02    |                        |
| 16   | Overall                         | 500 | 54/300 (18.0%)         | 13/200 (6.5%)      | 11.5% (6.0%-17.0%)     | 3.2 (1.7-6.0)          | <.001   | 0.62                   |
|      | Light 1-10                      | 260 | 32/154 (20.8%)         | 9/106 (8.5%)       | 12.3% (4.0%-20.1%)     | 2.8 (1.3-6.2)          | 0.008   |                        |
|      | Heavy >10                       | 240 | 22/146 (15.1%)         | 4/94 (4.3%)        | 10.8% (3.7%-17.9%)     | 4.0 (1.3-12.0)         | 0.009   |                        |
| 26   | Overall                         | 500 | 47/300 (15.7%)         | 13/200 (6.5%)      | 9.2% (3.8%-14.5%)      | 2.7 (1.4-5.1)          | 0.002   | 0.77                   |
|      | Light 1-10                      | 260 | 33/154 (21.4%)         | 9/106 (8.5%)       | 12.9% (4.5%-21.3%)     | 2.9 (1.3-6.4)          | 0.005   |                        |
|      | Heavy >10                       | 240 | 14/146 (9.6%)          | 4/94 (4.3%)        | 5.3% (-1.0%-11.6%)     | 2.4 (.8-7.5)           | 0.13    |                        |

Cotinine verified ( $\leq 15$  ng/mL). Participants with missing data were imputed as smoking.

eTable 2. Week 26 self-report and verified 7-day point prevalence smoking abstinence

|                                                                                                      | Treatment    |              | P value |
|------------------------------------------------------------------------------------------------------|--------------|--------------|---------|
|                                                                                                      | Varenicline  | Placebo      |         |
| A) Number of participants randomized                                                                 | 300          | 200          |         |
| B) Number of participants who completed Week 26 visit (B/A)                                          | 267 (89.0%)  | 174 (87.0%)  | NA      |
| C) Self-reported completers only abstinence at Week 26 (C/B)                                         | 114 (42.7%)  | 64 (36.8%)   | NA      |
| D) Verification samples obtained at Week 26 (D/C)                                                    | 109 (95.6%)  | 62 (96.9%)   | NA      |
| E) Verified abstinence for completers only (E/B)                                                     | 47 (17.6%)   | 13 (7.5%)    | 0.002   |
| F) Verified abstinence using Russel Standard* (F/A)                                                  | 47 (15.7%)   | 13 (6.5%)    | 0.002   |
| G) Verified abstinence using Last Observation Carried Forward                                        | 71 (23.7%)   | 19 (9.5%)    | <0.001  |
| H) Verified abstinence using Multiple Imputation**                                                   | 69.2 (23.1%) | 27.8 (13.9%) | 0.02    |
|                                                                                                      |              |              |         |
| *Participants with missing data imputed as smoking                                                   |              |              |         |
| **Average of 100 imputations assuming monotonic logistic regression with treatment and smoking level |              |              |         |

eFigure 1. Self-reported medication adherence over time by treatment

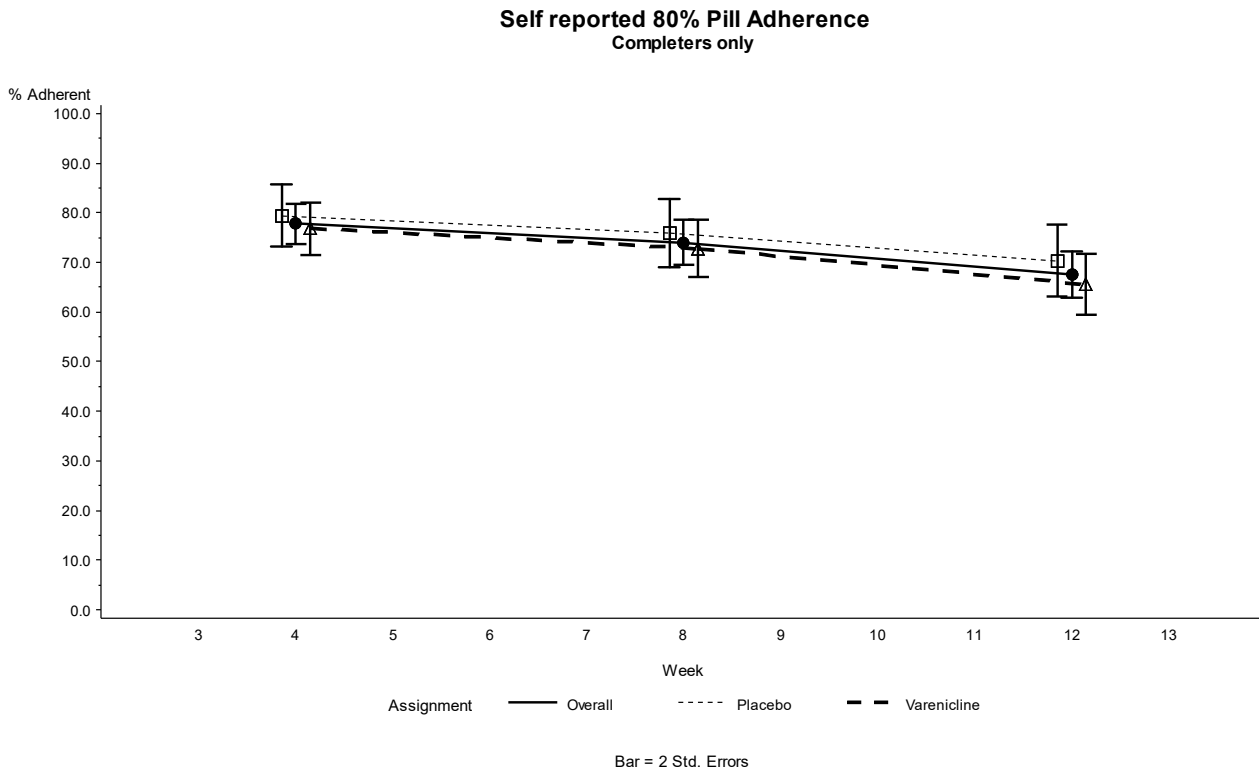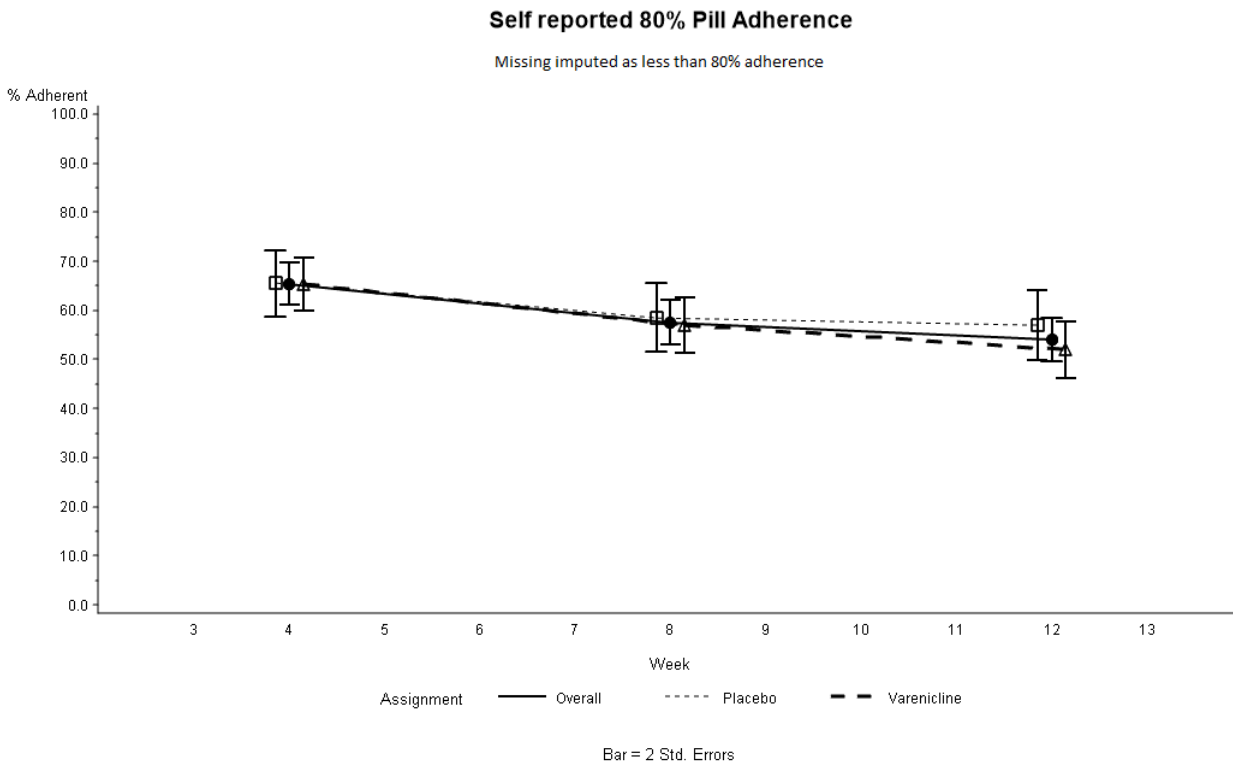

Supplement: jama-e228274-s002.pdf [file jama-e228274-s002.pdf]
