# Supplementary material
Source: PubMed Central journal article supplement (PMC9198729)
Supplement: jama-e228274-s003.pdf [file jama-e228274-s003.pdf]

## Data Sharing Statement

### Data

**Data available:** Yes

**Data types:** Other (please specify)

**Additional Information:** We will make the data and associated documentation available to users only under a data-sharing agreement that provides for: (1) a commitment to using the data only for research purposes and not to identify any individual participant; (2) a commitment to securing the data using appropriate computer technology; and (3) a commitment to destroying or returning the data after analyses are completed. All requests for data will go through a data request committee which will include Drs. Cox, Nollen, and Mayo who will review any requests and will oversee data sharing procedures. If the request is deemed reasonable by the committee, we will proceed with a data sharing agreement and secure data sharing plan, using a secure file transfer system which meets industry and government regulations (e.g., HIPPA, GLBA, SOX) to ensure data security and compliance.

**How to access data:** [LCox@kumc.edu](mailto:LCox@kumc.edu)

**When available:** With publication

### Supporting Documents

**Document types:** Other (please specify)

**Additional Information:** The IRB protocol is submitted with the manuscript. Additional information can be found at ClinicalTrials.gov <https://clinicaltrials.gov/ct2/show/NCT02360631>

**How to access documents:** The IRB protocol is submitted with the manuscript. Additional information can be found at ClinicalTrials.gov <https://clinicaltrials.gov/ct2/show/NCT02360631>

**When available:** With publication

### Additional Information

**Who can access the data:** We will make the data and associated documentation available to users only under a data-sharing agreement that provides for: (1) a commitment to using the data only for research purposes and not to identify any individual participant; (2) a commitment to securing the data using appropriate computer technology; and (3) a commitment to destroying or returning the data after analyses are completed. All requests for data will go through a data request committee which will include Drs. Cox, Nollen, and Mayo who will review any requests and will oversee data sharing procedures. If the request is deemed reasonable by the committee, we will proceed with a data sharing agreement and secure data sharing plan, using a secure file transfer system which meets industry and government regulations (e.g., HIPPA, GLBA, SOX) to ensure data security and compliance.

**Types of analyses:** We will make the data and associated documentation available to users only under a data-sharing agreement that provides for: (1) a commitment to using the data only for research purposes and not to identify any individual participant; (2) a commitment to securing the data using appropriate computer technology; and (3) a commitment to destroying or returning the data after analyses are completed. All requests for data will go through a data request committee which will include Drs. Cox, Nollen, and Mayo who will review any requests and will oversee data sharing procedures. If the request is deemed reasonable by the committee, we will proceed with a data sharing agreement and secure data sharing plan, using a secure file transfer system which meets industry and government regulations (e.g., HIPPA, GLBA, SOX) to ensure data security and compliance.

**Mechanisms of data availability:** We will make the data and associated documentation available to users only under a data-sharing agreement that provides for: (1) a commitment to using the data only for research purposes and not to identify any individual participant; (2) a commitment to securing the data using appropriate computer technology; and (3) a commitment to destroying or returning the data after analyses are completed. All requests for data will go through a data request committee which will include Drs. Cox, Nollen, and Mayo who will review any requests and will oversee data sharing procedures. If the request is

deemed reasonable by the committee, we will proceed with a data sharing agreement and secure data sharing plan, using a secure file transfer system which meets industry and government regulations (e.g., HIPPA, GLBA, SOX) to ensure data security and compliance.
